# Supplementary material for: Reversed charge transfer in a type I MoS 2 /PtSe 2 heterostructure probed by ultrafast two-dimensional electronic spectroscopy
Source: Royal Society of Chemistry journal article supplement (doi:10.1039/d4tc03378g), 2024-01-01
Supplement: d4tc03378g1.pdf [file d4tc03378g1.pdf]

**Supplementary Information for**

**Reversed charge transfer in type I MoS<sub>2</sub>/PtSe<sub>2</sub>  
heterostructure probed by ultrafast two-  
dimensional electronic spectroscopy**

*Niu Xu<sup>1</sup>, Weiming Song<sup>1</sup>, Kaizhen Liu<sup>1</sup>, Jin Yang<sup>1\*</sup>, Jin-Hui Zhong<sup>1,2,3\*</sup>*

<sup>1</sup>Department of Materials Science and Engineering, Southern University of Science and Technology, Shenzhen 518055, China

<sup>2</sup>Guangdong Provincial Key Laboratory of Sustainable Biomimetic Materials and Green Energy, Southern University of Science and Technology, Shenzhen 518055, China

<sup>3</sup>Institute of Innovative Materials, Southern University of Science and Technology, Shenzhen 518055, China

\*email: [yangj8@sustech.edu.cn](mailto:yangj8@sustech.edu.cn); [zhongjh@sustech.edu.cn](mailto:zhongjh@sustech.edu.cn)

## Section 1. Full range absorption spectra of the samples

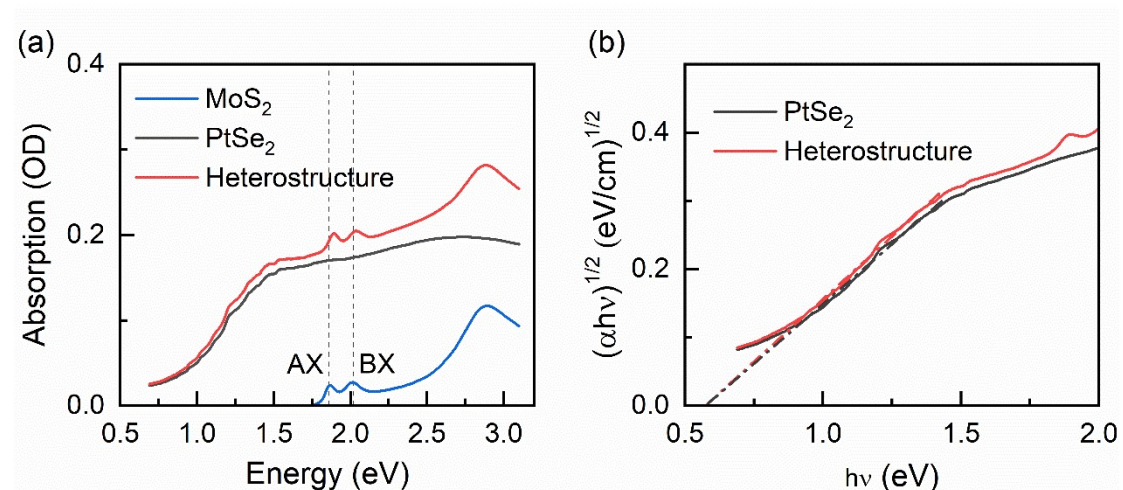

**Fig. S1** (a) Full range absorption spectra of MoS<sub>2</sub>, PtSe<sub>2</sub>, and the heterostructure. (b) The Tauc plots of bare PtSe<sub>2</sub> and heterostructure which are obtained by:  $(\alpha h\nu)^{1/2} = B(h\nu - E_g)$ . Here,  $E_g$  represents for indirect bandgap,  $h\nu$  is photon energy ( $h = 4.13 \times 10^{-15}$  eV · s is Planck's constant,  $\nu$  is the frequency of the light),  $\alpha$  is absorption coefficient and B is a constant. Thus, by extracting the intercept with the x-axis, the bandgap  $E_g$  can be determined by fitting the linear relationship between  $(\alpha h\nu)^{1/2}$  and  $h\nu$ . The result shows that bare PtSe<sub>2</sub> and the PtSe<sub>2</sub> in the heterostructure have similar optical bandgap of 0.57 eV.

## Section 2. Fitting procedure and time constants of the dynamics in transient transmission spectra

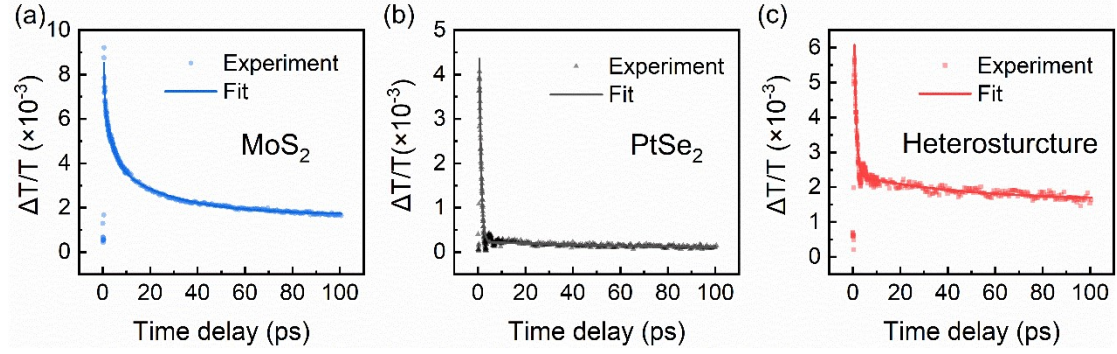

**Fig. S2** Experimental peak dynamics (symbols) and multi-exponential fitting results (lines). (a) A exciton bleaching signal at 1.86 eV probe energy from the bare MoS<sub>2</sub> sample. (b) Bleaching signal at 1.87 eV probe energy from the bare PtSe<sub>2</sub> sample. (c) A exciton bleaching signal at 1.87 eV probe energy from the heterostructure sample.

Multi-exponential fitting is applied to extract the kinetic behavior in transient transmission data. The interested probe energy is selected to be the MoS<sub>2</sub> A exciton bleaching peak for bare MoS<sub>2</sub> (1.86 eV) and the heterostructure (1.87 eV). For bare PtSe<sub>2</sub>, since its response is broadband, we also chose the signal at 1.87 eV to examine the relaxation dynamics. Note that the dynamics in bare PtSe<sub>2</sub> does not vary for different probe energy. The fitted results are reported in Figure S2 as solid lines, which well reproduce the experimental data (symbols), and the fitted time parameters are listed in Table S1.

We found that the dynamics of bare PtSe<sub>2</sub> (Fig. S2b) can be well fitted with a bi-exponential function  $F_1(t)$ ,

$$F_1(t) = A_1 \exp\left(-\frac{t}{\tau_1}\right) + A_2 \exp\left(-\frac{t}{\tau_2}\right) + y_0. \quad (1)$$

in which the two time constants  $\tau_1$  and  $\tau_2$  represents defect trapping and Auger recombination, respectively.<sup>1</sup>

The dynamics of bare MoS<sub>2</sub> can be fitted with a three-exponential decay function  $F_2(t)$ ,

$$F_2(t) = A_1 \exp\left(-\frac{t}{\tau_1}\right) + A_2 \exp\left(-\frac{t}{\tau_2}\right) + A_3 \exp\left(-\frac{t}{\tau_3}\right) + y_0. \quad (2)$$

in which  $\tau_1$ ,  $\tau_2$ ,  $\tau_3$  represents for defects-assisted intraband scattering, fast trapping of excitons by surfaces defects and carrier-phonon scattering, respectively.<sup>2</sup>

In equations (1-2),  $\tau_i$  are decay times,  $A_i$  are the weights of the respective exponential

functions, and  $y_0$  is the base line value.

The dynamics at the A exciton bleaching peak of the heterostructure can also be fitted with a bi-exponential function (Fig. S2a). Since the signal of the heterostructure at this probe energy contains both the PtSe<sub>2</sub> response and the A exciton dynamics of MoS<sub>2</sub>, we assign the early time dynamics to be dominant by the PtSe<sub>2</sub>. The latter decay constant is mainly contributed by A exciton relaxation dynamics because the signal of PtSe<sub>2</sub> is much weaker than that of MoS<sub>2</sub> in this probe energy (see Fig. 2g in the main text). Table S1. Fitted time constants from the multi-exponential decay model.

| Sample            | $\tau_1$ (ps)   | $\tau_2$ (ps)      | $\tau_3$ (ps)    |
|-------------------|-----------------|--------------------|------------------|
| MoS <sub>2</sub>  | $0.26 \pm 0.02$ | $3.93 \pm 0.21$    | $26.37 \pm 1.45$ |
| PtSe <sub>2</sub> | $0.78 \pm 0.01$ | $136.74 \pm 22.65$ | —                |
| Heterostructure   | $0.86 \pm 0.03$ | $44.89 \pm 9.05$   | —                |

### Section 3. Peak dynamics in 2DES maps

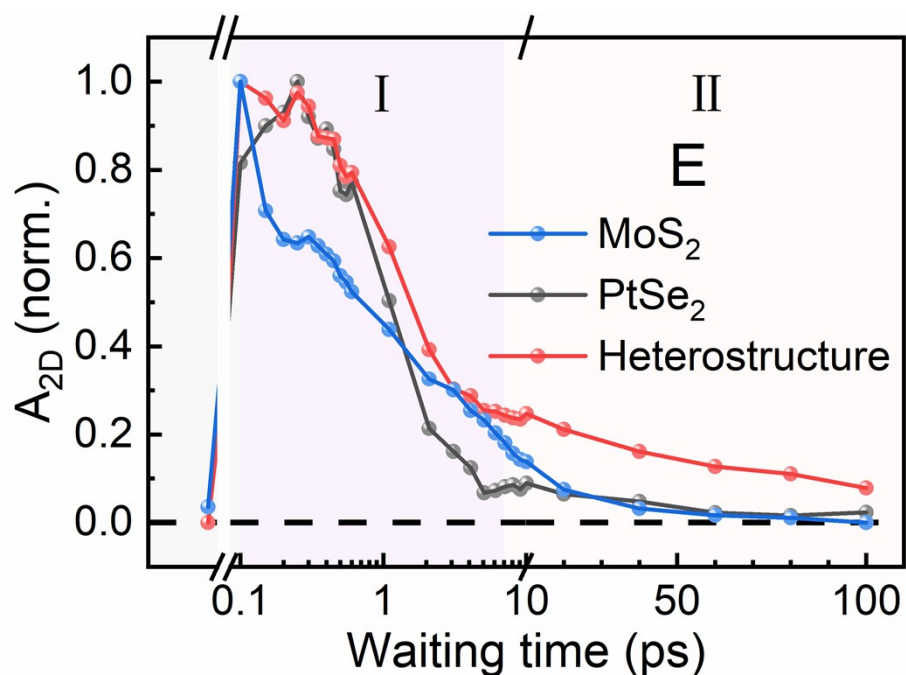

**Fig. S3** Normalized peak dynamics of the region marked as E in the 2DES maps in Figure 3c. Region E corresponds for the A exciton bleaching response in MoS<sub>2</sub> and the heterostructure.

Before 2 ps, the signal in the heterostructure decays slower compared to that of bare PtSe<sub>2</sub>, suggesting the existence of charge transfer, which prolongs the relaxation as the charges are separated in different materials. Further, there is an additional slow decay after a few picoseconds in the heterostructure, much slower than that of bare MoS<sub>2</sub>. This feature is consistent with the results in region C (fig .4c), corresponding to Auger-assisted secondary charge transfer.

## Reference

1. H. J. Shin, S. Bae and S. Sim, *Nanoscale*, 2020, **12**, 22185.
2. H. Shi, R. Yan, S. Bertolazzi, J. Brivio, B. Gao, A. Kis, D. Jena, H. G. Xing and L. Huang, *ACS Nano*, 2013, **7**, 1072.
